# Supplementary material for: Management of delayed bleeding after endoscopic mucosal resection of large colorectal polyps: a retrospective multi-center cohort study
Source: PubMed Central journal article supplement — Endosc Int Open. 2020 Jul 21;8(8):E1052–60. doi: 10.1055/a-1192-3816 (PMC7373661; doi:10.1055/a-1192-3816), 2020-07-21
Supplement: 1820supmat-10-1055-a-1192-3816.pdf [file 1820supmat-10-1055-a-1192-3816.pdf]

## Supplementary Material

### Management of delayed bleeding after endoscopic mucosal resection of large colorectal polyps: a retrospective multi-center cohort study

Simone van der Star, Leon M.G. Moons, Frank ter Borg, Jeroen D. van Bergeijk, Joost M.J. Geesing, John N. Groen, Renske J. Ouwehand, Frank P. Vleggaar, Wouter H. de Vos tot Nederveen Cappel, Frank H.J. Wolfhagen, Matthijs P. Schwartz, Paul Didden

**Supplementary Table 1** Logistic regression analysis to identify factors associated with DB.

**Supplementary Table 2** Data per center, including number of polyps, DBs and re-colonoscopies rate.

**Supplementary Table 3** Oakland risk score in patients with delayed bleeding, including performed re-colonoscopies and stigmata of recent hemorrhage.

**Supplementary Table 1** Logistic regression analysis to identify factors associated with DB.

|                                | Univariable analysis |         | Best fitting multiple logistic regression model |         |
|--------------------------------|----------------------|---------|-------------------------------------------------|---------|
|                                | OR (95% CI)          | P value | Adjusted OR (95% CI)                            | P value |
| <b>Patient characteristics</b> |                      |         |                                                 |         |
| Mean age                       | 1.02 (0.98 - 1.07)   | 0.29    |                                                 |         |
| Gender                         |                      |         |                                                 |         |
| Female                         | 1                    |         | Excluded from final model                       |         |
| Male                           | 1.91 (0.94- 3.90)    | 0.074   |                                                 |         |
| ASA score                      |                      |         |                                                 |         |
| 1 or 2                         | 1                    |         | Excluded from final model                       |         |
| 3 or 4                         | 2.0 (0.98- 4.06)     | 0.056   |                                                 |         |
| Comorbidity conditions         |                      |         |                                                 |         |
| None                           | 1                    |         |                                                 |         |
| Cardiovascular                 | 2.51 (1.26- 5.02)    | 0.009   |                                                 |         |
| Pulmonary                      |                      | 0.26    |                                                 |         |

|                                                                   |                                      |       |                           |       |
|-------------------------------------------------------------------|--------------------------------------|-------|---------------------------|-------|
| Renal                                                             | 1.52 (0.74-3.14)<br>2.13 (0.84-5.40) | 0.11  | Excluded from final model |       |
| Continued antithrombotic                                          |                                      |       |                           |       |
| None                                                              | 1                                    |       | Excluded from final model |       |
| Yes*                                                              | 2.12 (1.04-4.31)                     | 0.039 |                           |       |
| Use of antithrombotic drugs within seven days after the procedure | 1                                    |       | 1                         |       |
| None                                                              | 2.91 (1.34-6.31)                     | 0.007 | 2.86                      | 0.009 |
| Platelet aggregation inhibitors                                   | 6.31                                 | 0.00  | (1.3-6.26)                | 0.00  |
| Anticoagulation                                                   | 4.75 (2.19-10.3)                     |       | 4.72                      |       |
|                                                                   |                                      |       | (2.12-10.53)              |       |
| <b>Polyp characteristics</b>                                      |                                      |       |                           |       |
| Increasing lesion size, per cm, mean (SD)                         | 1.17 (0.99-1.37)                     | 0.062 | 1.19                      | 0.040 |
|                                                                   |                                      |       | (1.01-1.41)               |       |
| Lesion location                                                   |                                      |       |                           |       |
| Distal location <sup>†</sup>                                      | 1                                    |       | 1                         |       |
| Proximal location <sup>‡</sup>                                    | 1.69 (0.9-3.17)                      | 0.11  | 1.9                       | 0.057 |
|                                                                   |                                      |       | (0.98-3.66)               |       |
| <b>Procedural characteristics</b>                                 |                                      |       |                           |       |
| Status of EMR                                                     |                                      |       |                           |       |
| First EMR                                                         | 1                                    |       | Excluded from final model |       |
| EMR for residual/recurrence                                       | 1.96 (0.72-5.34)                     | 0.19  |                           |       |
| Submucosal lifting                                                |                                      |       |                           |       |
| Complete                                                          | 1                                    |       |                           |       |
| Suboptimal                                                        | 1.09 (0.49-2.44)                     | 0.83  |                           |       |
| Submucosal adrenaline injection                                   | 1                                    |       |                           |       |
| No                                                                | 1.39 (0.51-3.78)                     | 0.52  |                           |       |
| Yes                                                               |                                      |       |                           |       |
| Resection                                                         |                                      |       |                           |       |
| Piecemeal                                                         | 1                                    |       |                           |       |
| En bloc                                                           | 0.54 (0.13-2.31)                     | 0.40  |                           |       |
| Success of resection                                              |                                      |       |                           |       |
| Complete                                                          | 1                                    |       |                           |       |
| Incomplete                                                        | 0.95 (0.22-4.16)                     | 0.95  |                           |       |
| Intraprocedural bleeding                                          |                                      |       |                           |       |
| No                                                                | 1                                    |       |                           |       |
| Yes                                                               |                                      | 0.68  |                           |       |

|                                                                                  |             |      |
|----------------------------------------------------------------------------------|-------------|------|
| Prophylactic clip closure                                                        | 0.86 (0.41- |      |
| Yes                                                                              | 1.79)       |      |
| No                                                                               |             | 0.34 |
| Concurrent polypectomy of small (< 20 mm) or large pedunculated polyps (≥ 20 mm) | 1           |      |
| No                                                                               | 1.68 (0.58- |      |
| Yes                                                                              | 4.84)       | 0.40 |
| <b>Histology</b>                                                                 |             |      |
| Benign polyp                                                                     | 1           |      |
| Carcinoma                                                                        | 0.94 (0.22- | 0.94 |
|                                                                                  | 4.11)       |      |

\* Platelet aggregation inhibitors or anticoagulation

† Including rectum, sigmoid, descending colon, splenic flexure, transverse colon and hepatic flexure

‡ Including cecum and ascending colon

**Supplementary Table 2** Data per center, including number of polyps, DBs and re-colonoscopy rate.

| <b>Center</b>                 | <b>LNPCPs</b><br>n= 542 | <b>DB*</b><br>n= 42 | <b>Re-colonoscopy</b><br>n=30 (%) |
|-------------------------------|-------------------------|---------------------|-----------------------------------|
| Academic center 1             | 284 (52.4)              | 19                  | 13 (68.4)*                        |
| Non-academic center 1         | 31 (5.7)                | 3                   | 2 (66.7)                          |
| Non-academic center 2         | 42 (7.7)                | 3                   | 3 (100)                           |
| Non-academic center 3         | 17 (3.1)                | 0                   | -                                 |
| Non-academic center 4         | 64 (11.8)               | 4                   | 4 (100)                           |
| Non-academic center 5         | 56 (10.3)               | 10                  | 7 (70.0)                          |
| Non-academic center 6         | 23 (4.2)                | 2                   | 1 (50.0)                          |
| Non-academic center 7         | 25 (4.6)                | 1                   | 0 (0.0)                           |
| Total in non-academic centers | 258                     | 23                  | 17 (73.9)                         |

DB, delayed bleeding.

\* In two patients DB was managed in the referring non-academic center

**Supplementary Table 3** Oakland risk score in patients with delayed bleeding, including performed re-colonoscopies and stigmata of recent hemorrhage.

| <b>Oakland risk score</b> | <b>Patients (n)</b><br><i>n=42</i> | <b>Safe discharge*</b><br><b>(n, %)</b> | <b>Colonoscopy performed (n, %)</b> | <b>SRH† (n)</b> |
|---------------------------|------------------------------------|-----------------------------------------|-------------------------------------|-----------------|
| 0-15                      | 0                                  | -                                       | -                                   | -               |
| 16-20                     | 6                                  | 3 (50.0)                                | 3 (50.0)                            | 3               |
| 21-23                     | 11                                 | 7 (63.6)                                | 7 (63.6)                            | 5               |
| 24-26                     | 10                                 | 3 (30.0)                                | 7 (70.0)                            | 5               |
| 27-29                     | 9                                  | 0 (0.0)                                 | 8 (88.9)                            | 7               |
| ≥ 30                      | 6                                  | 1 (16.7)                                | 5 (83.3)                            | 4               |

\* Safe discharge was defined as absence of all of the following after presentation: any hemostatic intervention, red blood transfusion, recurrent bleeding within 28 days.

† Stigmata of recent hemorrhage, based on endoscopic visualization of active bleeding, nonbleeding visible vessel or adherent clot.
